# Supplementary material for: New azole derivatives linked to indole/indoline moieties combined with FLC against drug-resistant Candida albicans
Source: Royal Society of Chemistry journal article supplement (doi:10.1039/d4md00021h), 2024-01-01
Supplement: d4md00021h1.pdf [file d4md00021h1.pdf]

## Supporting Information

### New azole derivatives linked to indole/indoline moieties combined with FLC against drug-resistant *C. albicans*

Yunhong Shen<sup>†</sup>, Min Pan<sup>†</sup>, Hui Gao, Yi Zhang, Ruirui Wang, Jun Li\* and Zewei Mao\*

*School of Chinese Materia Medica, Yunnan University of Chinese Medicine, Kunming 650500, PR China*

|                                               |           |
|-----------------------------------------------|-----------|
| <b>1. NMR spectra of compounds</b> · · · · ·  | <b>2</b>  |
| <b>2. HRMS spectra of compounds</b> · · · · · | <b>18</b> |

---

\* Corresponding author. *E-mail address*: 411790624@qq.com (J. Li), maozw@ynutcm.edu.cn (Z. Mao).

<sup>†</sup> These authors contributed equally to this work.

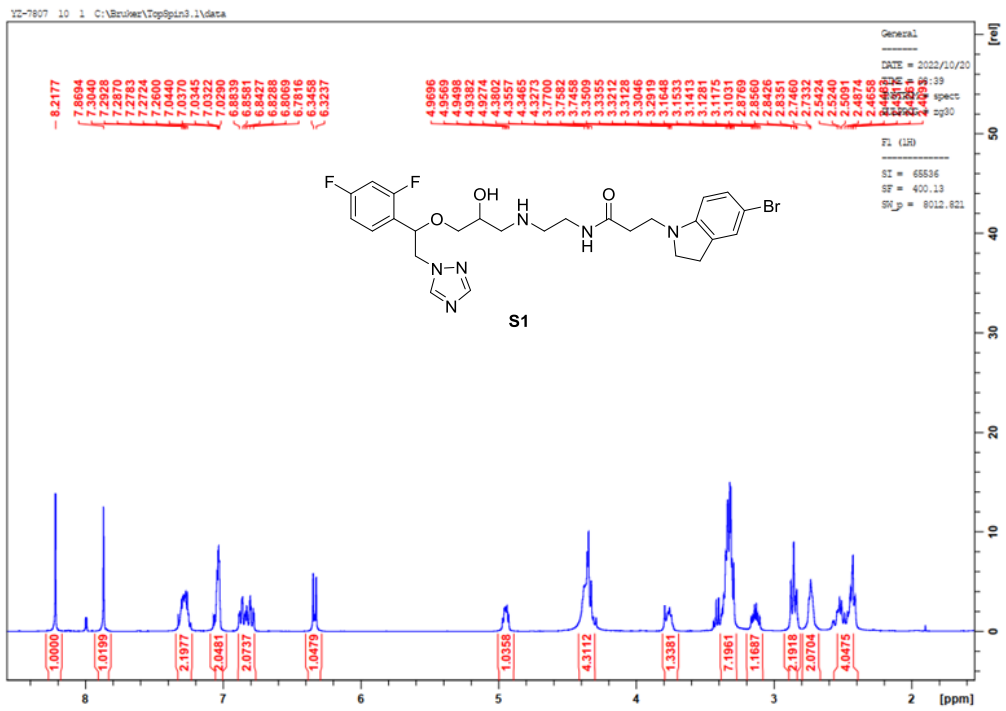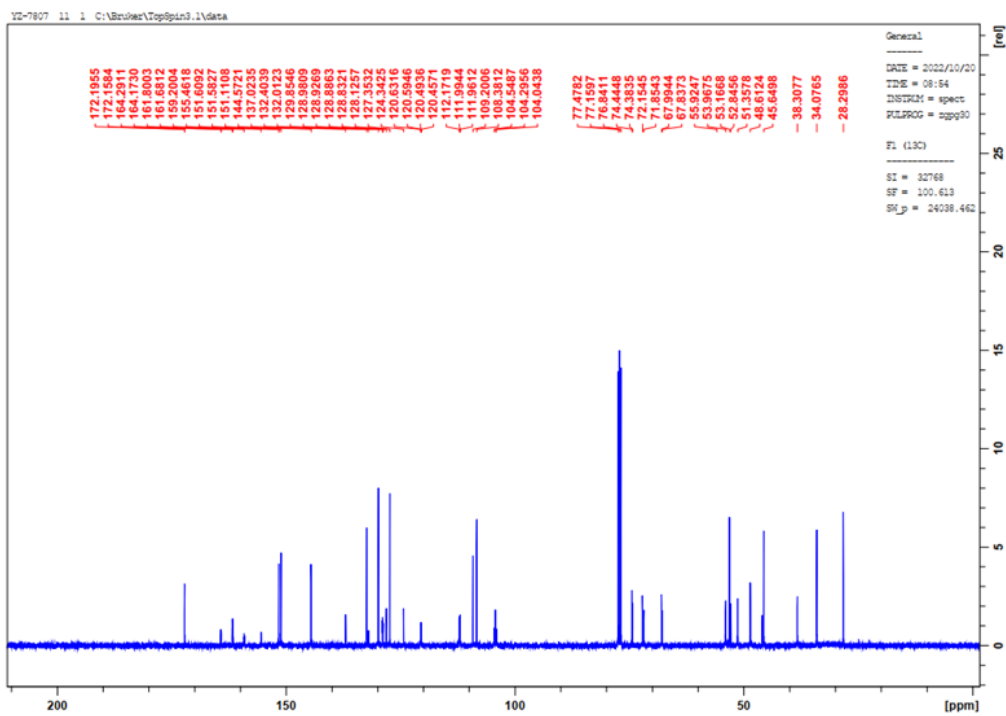

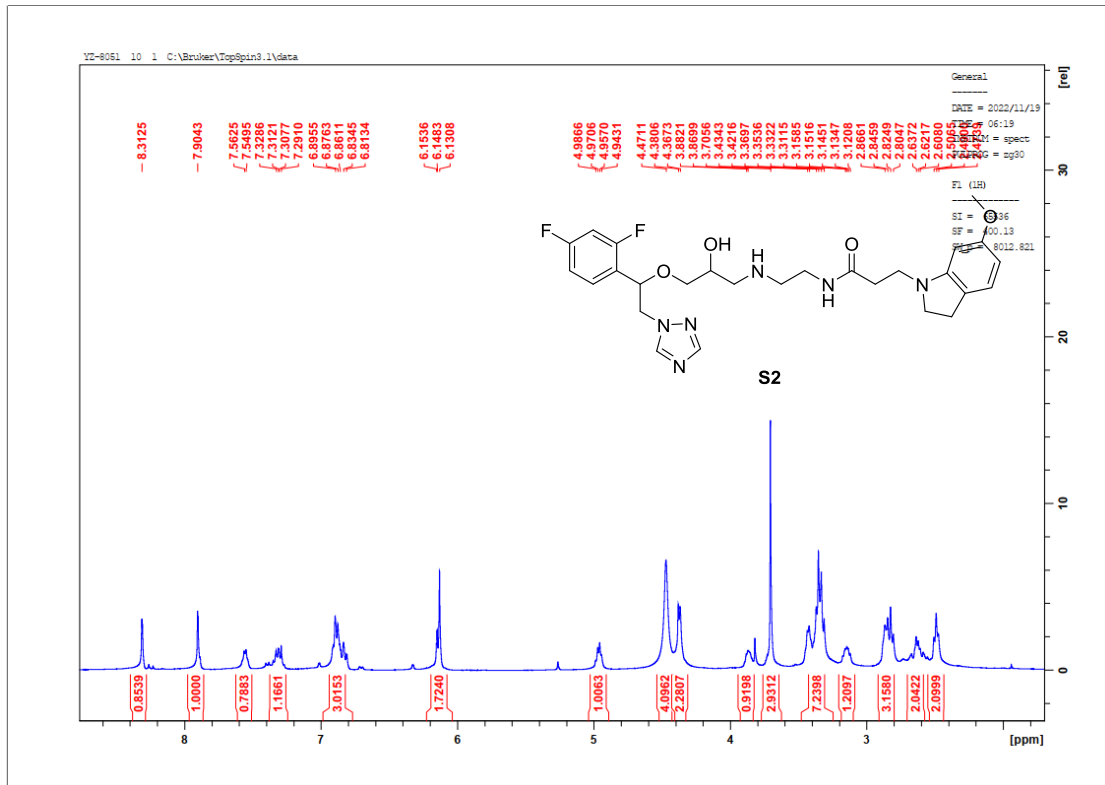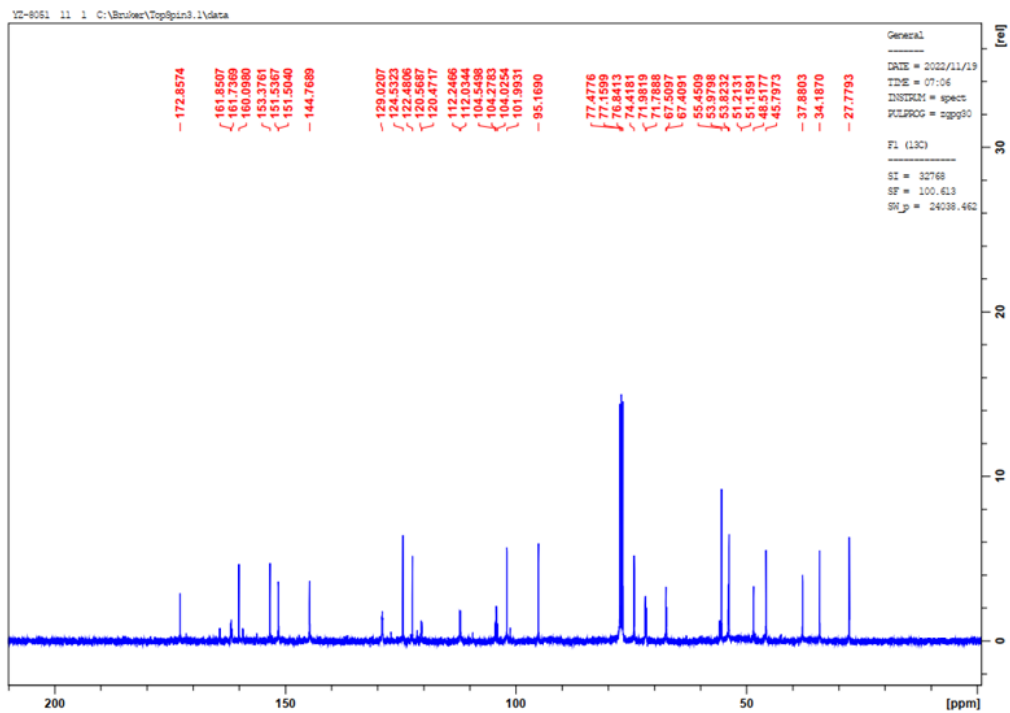

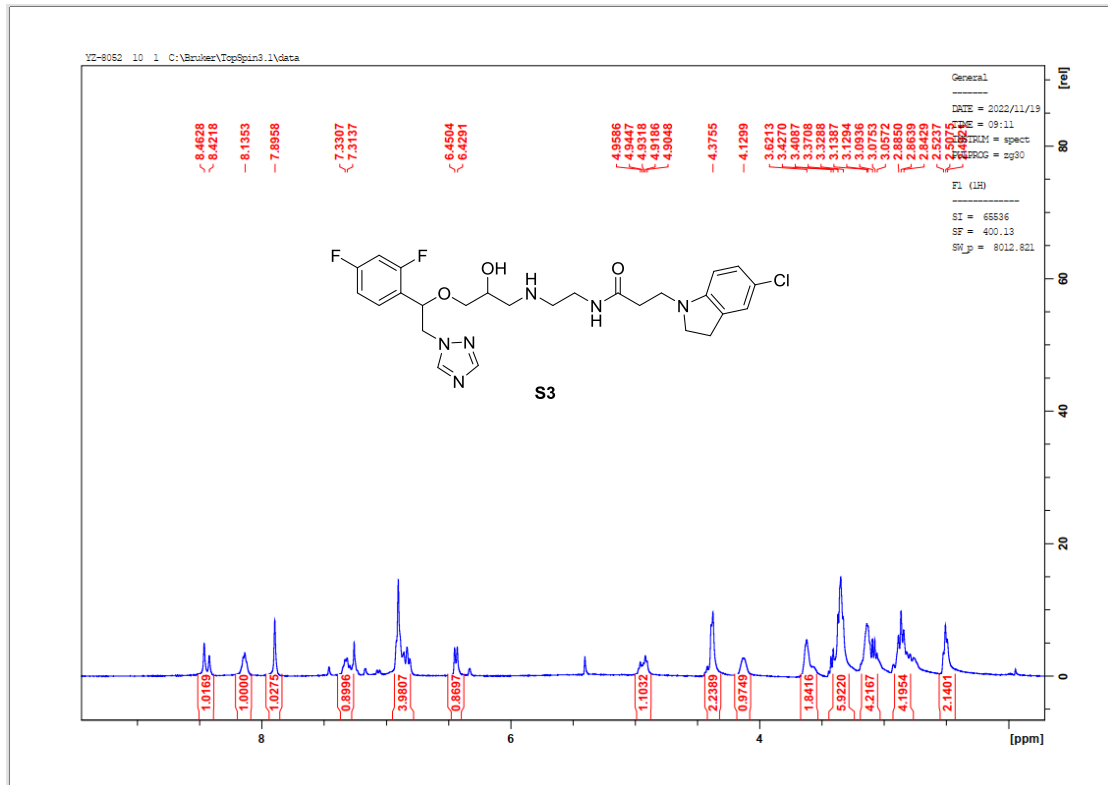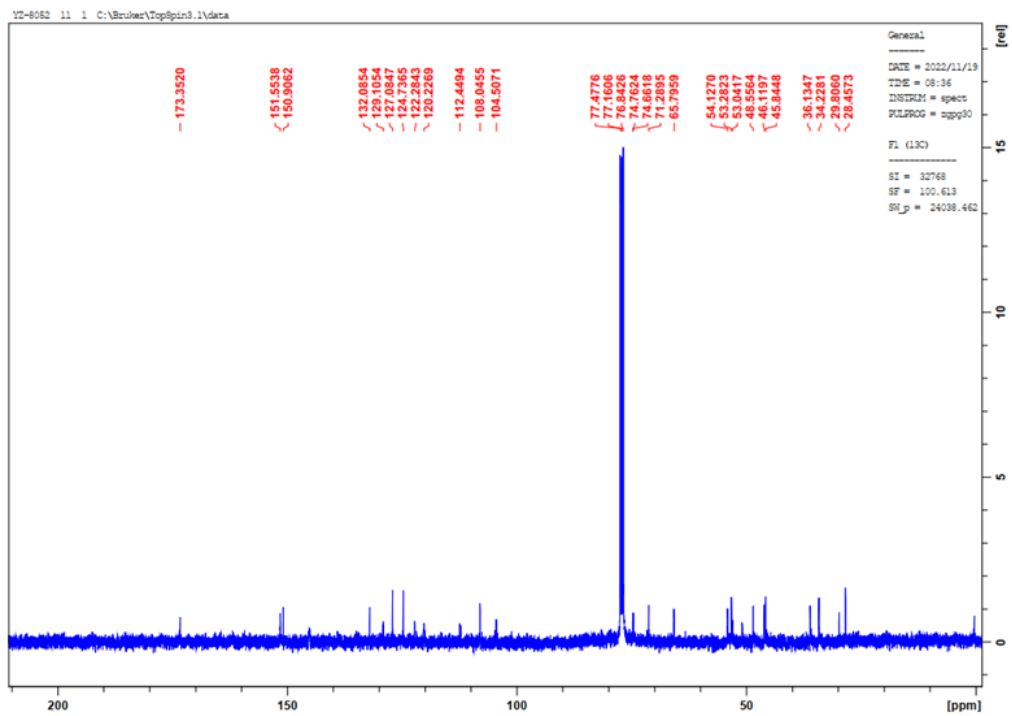

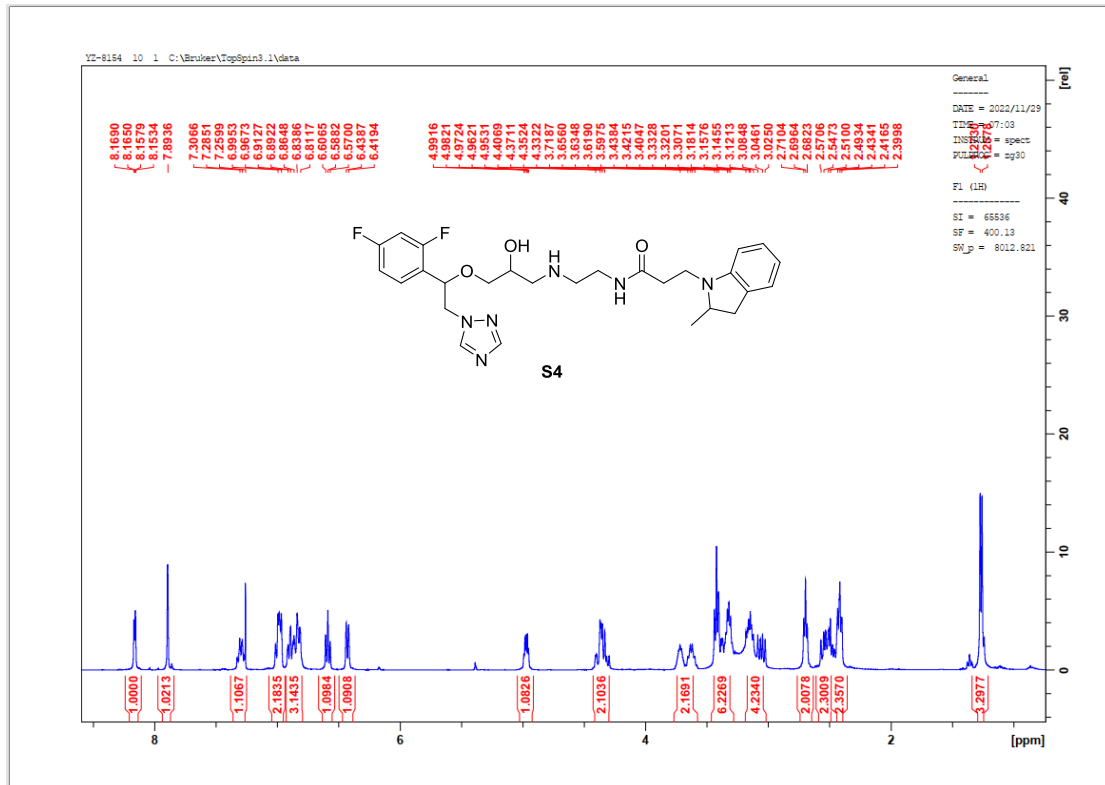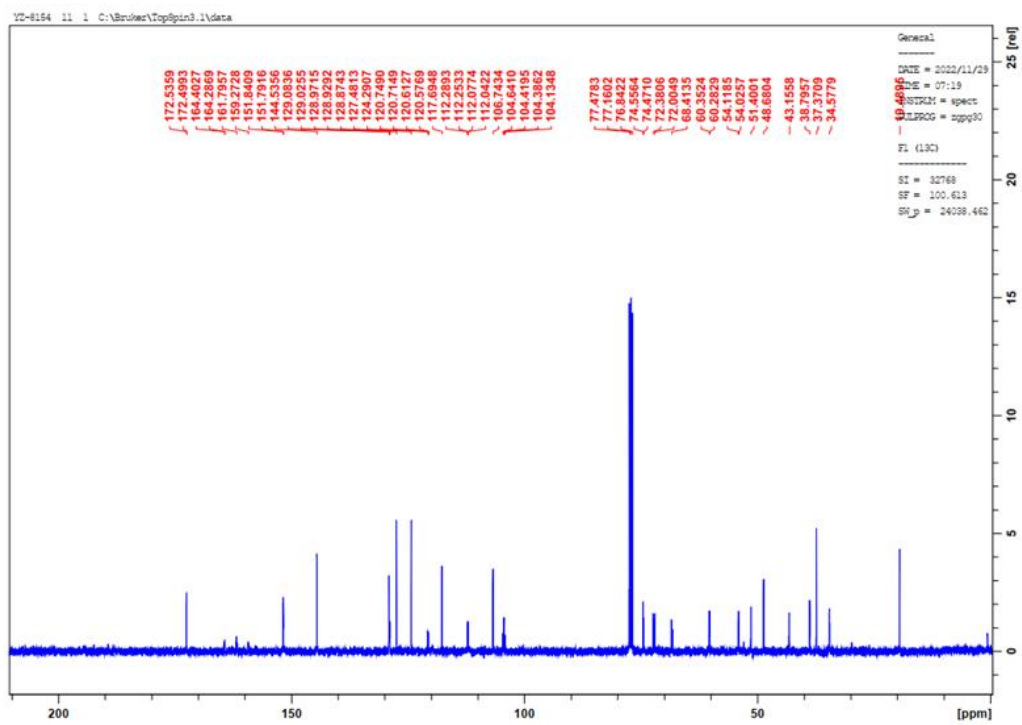

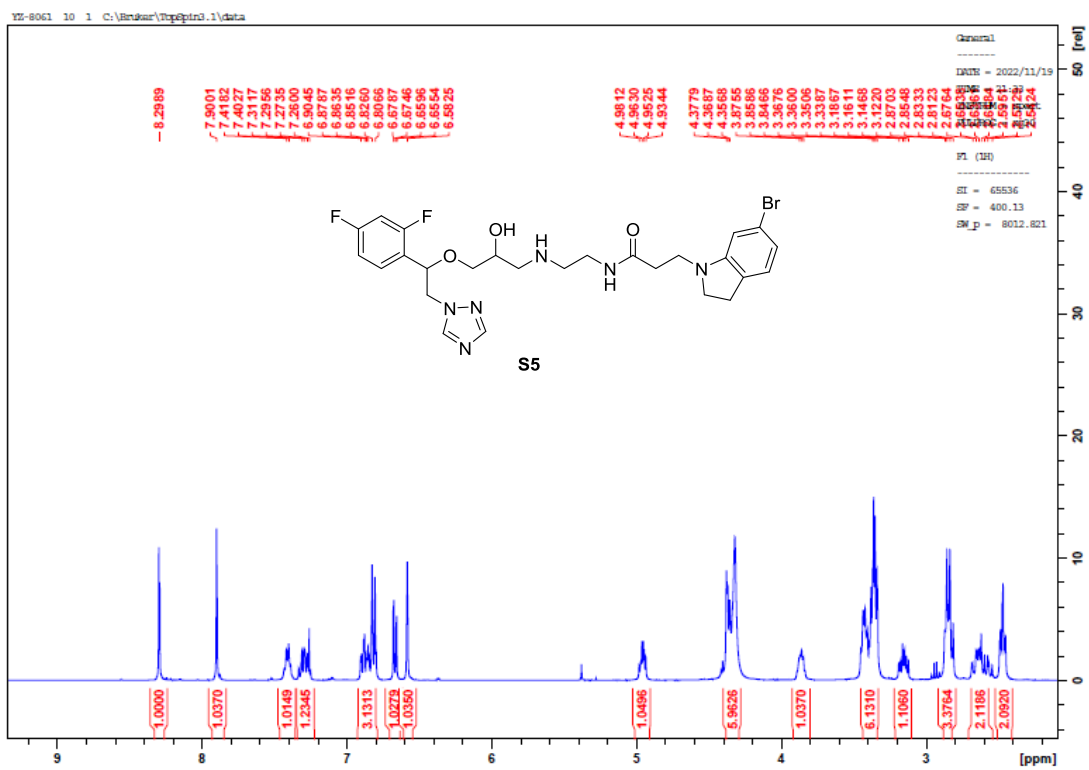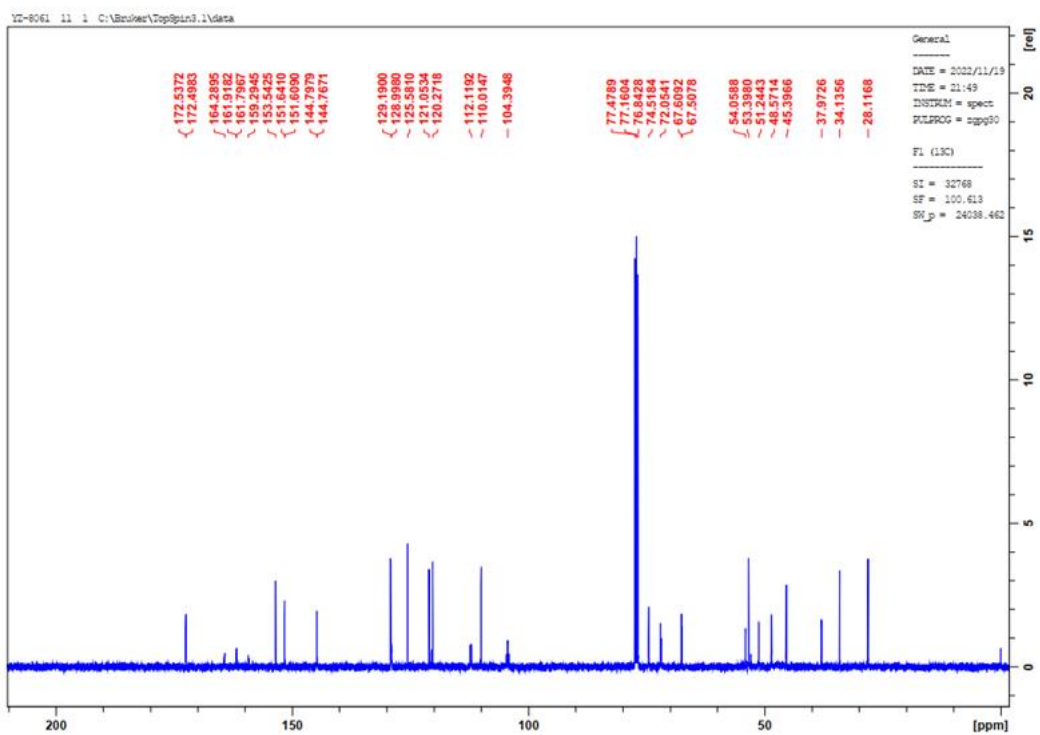

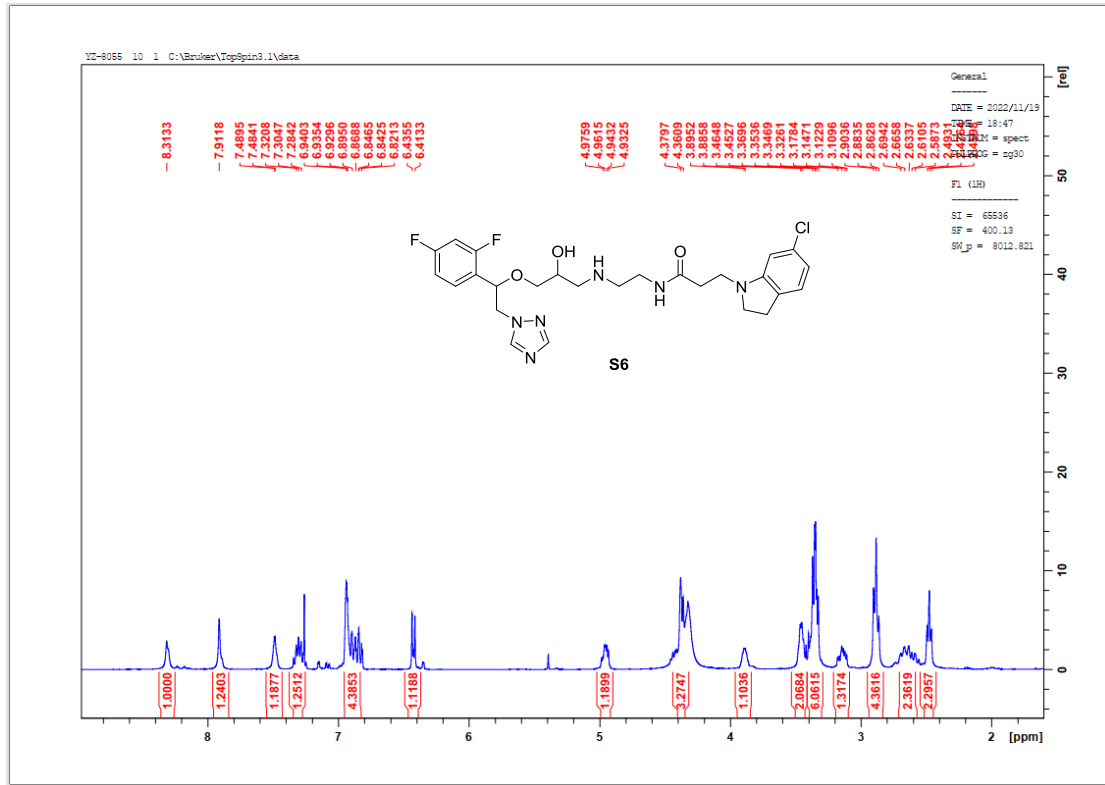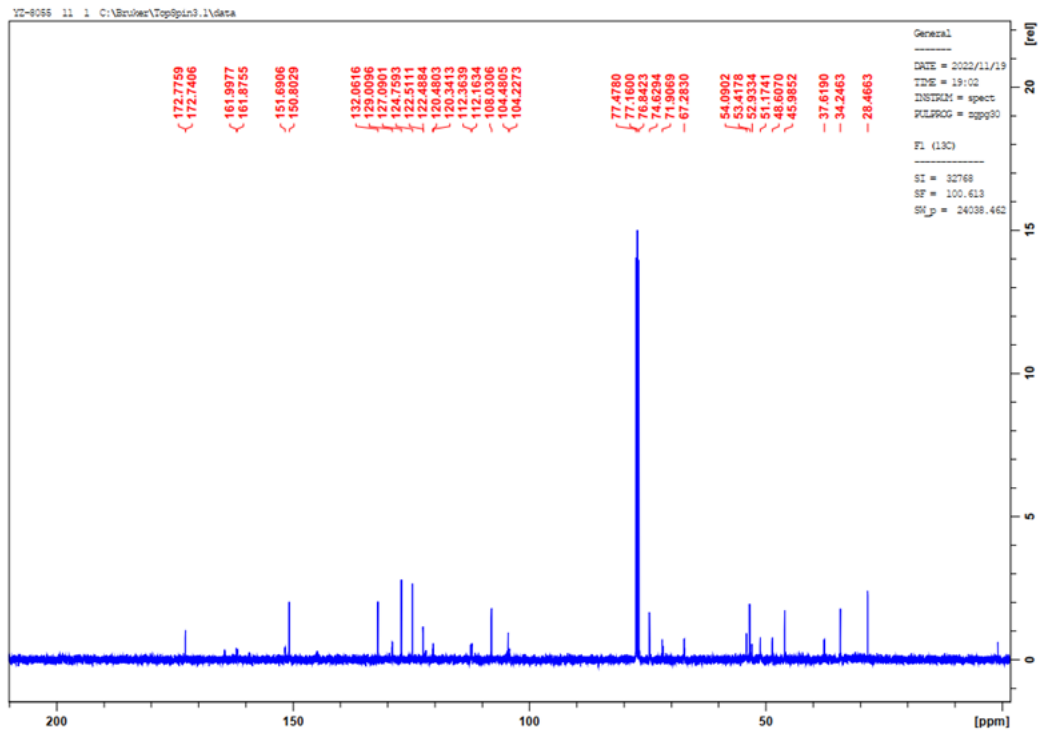

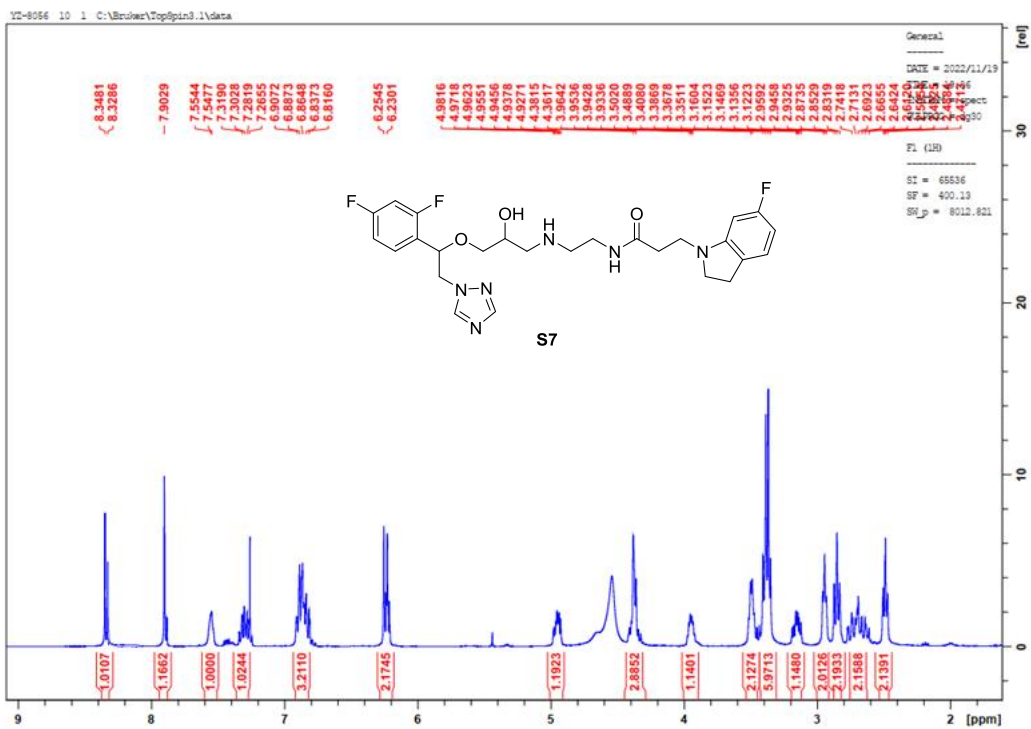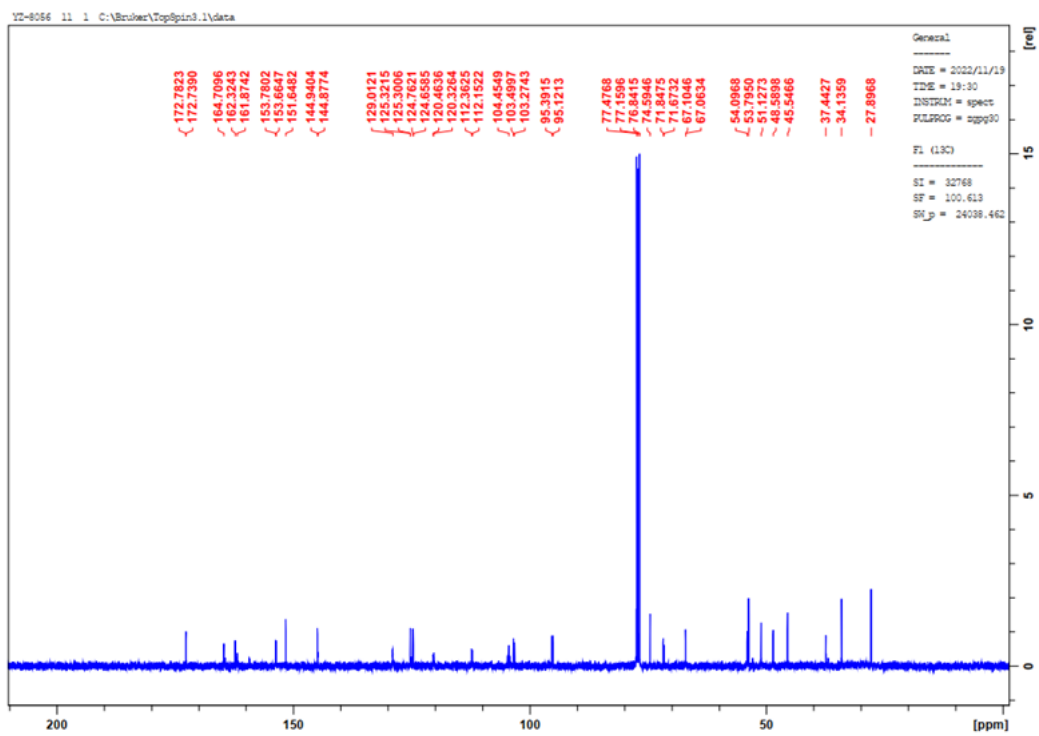



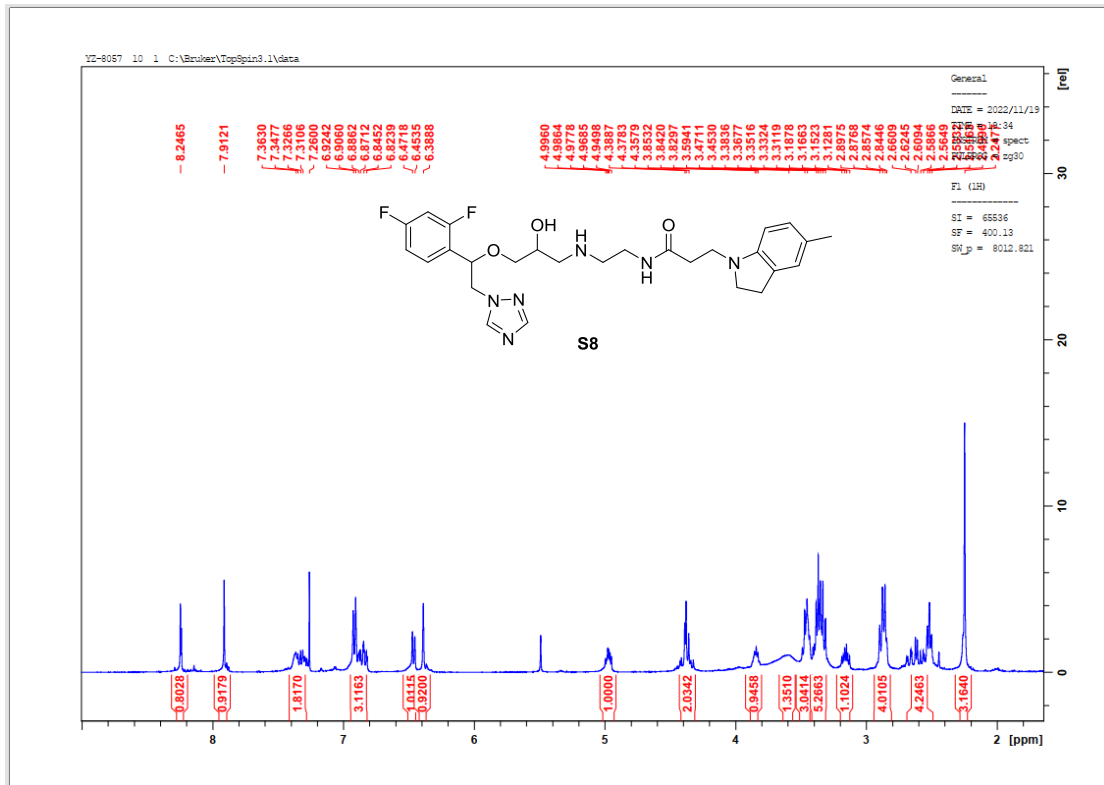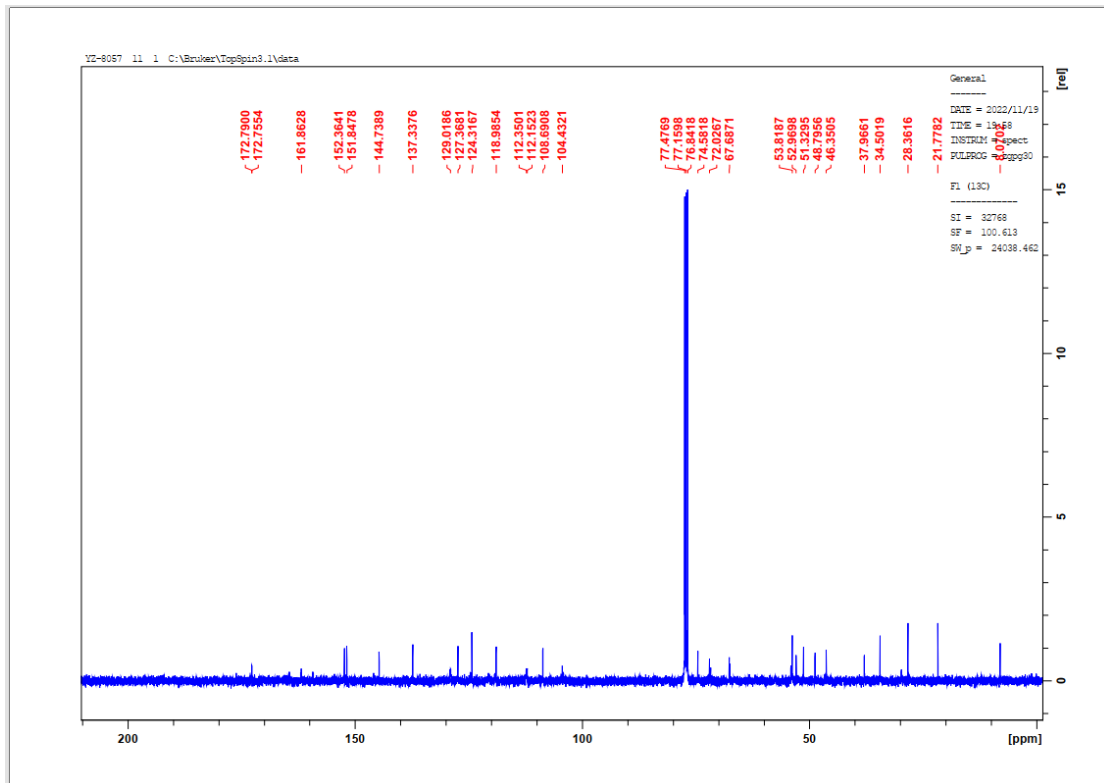

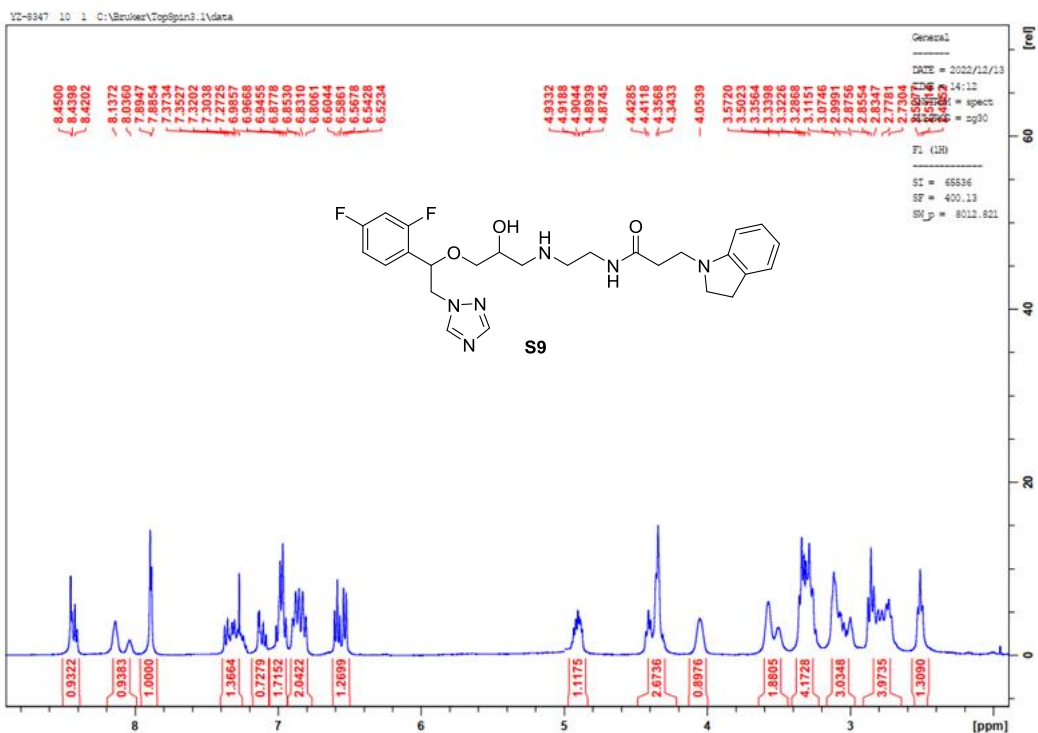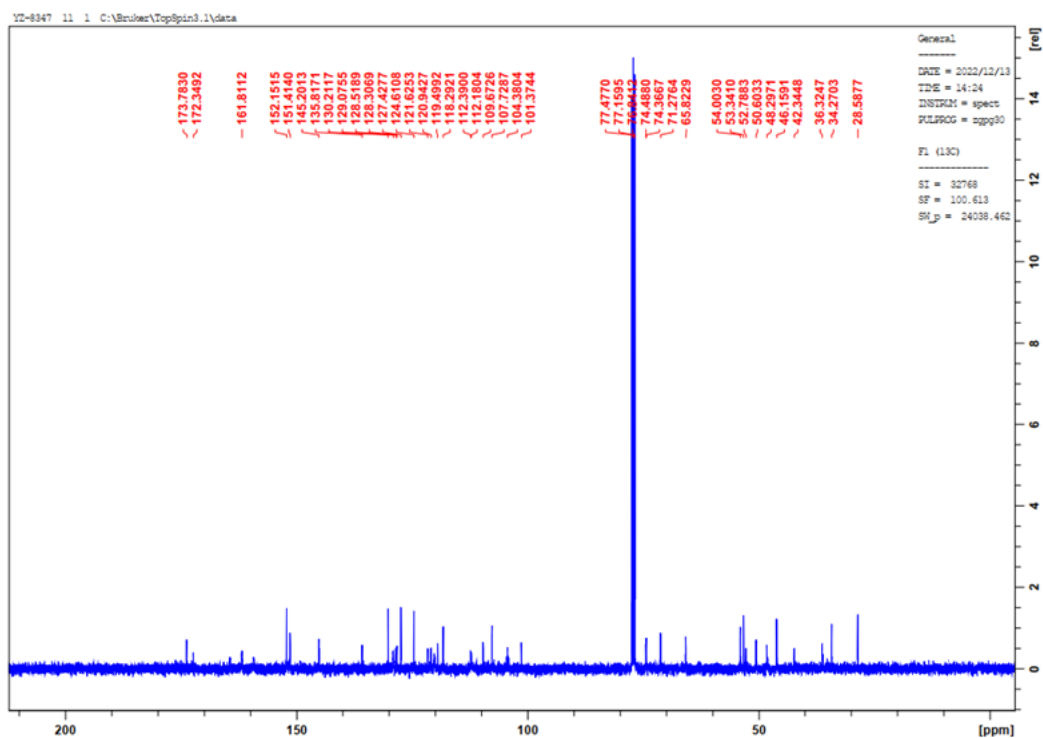

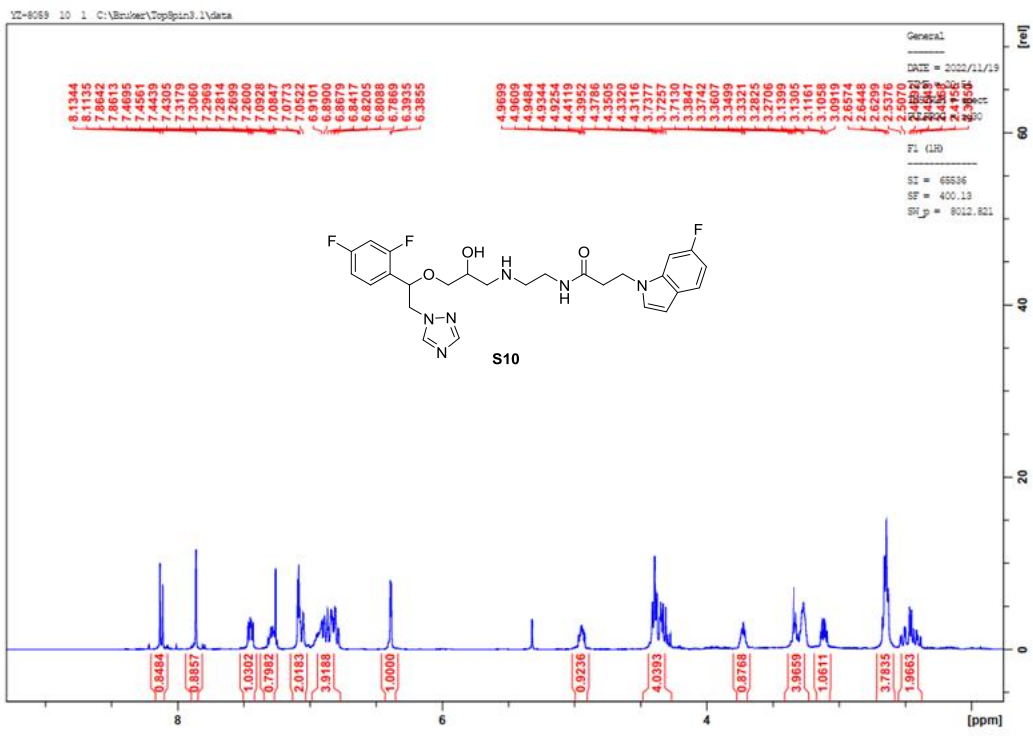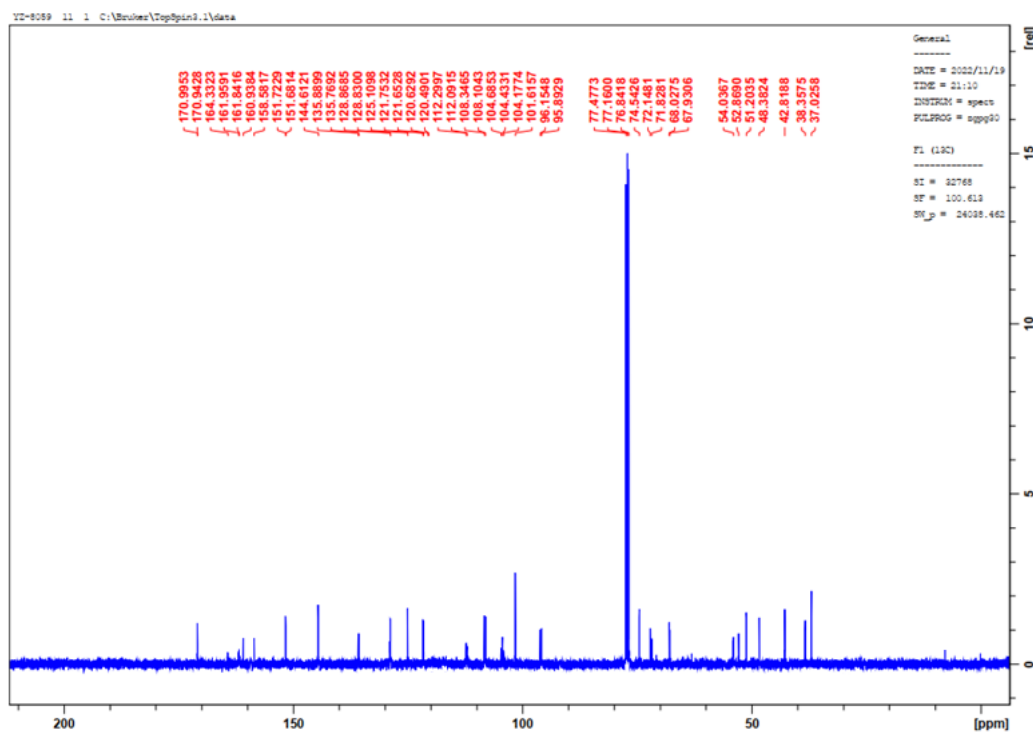

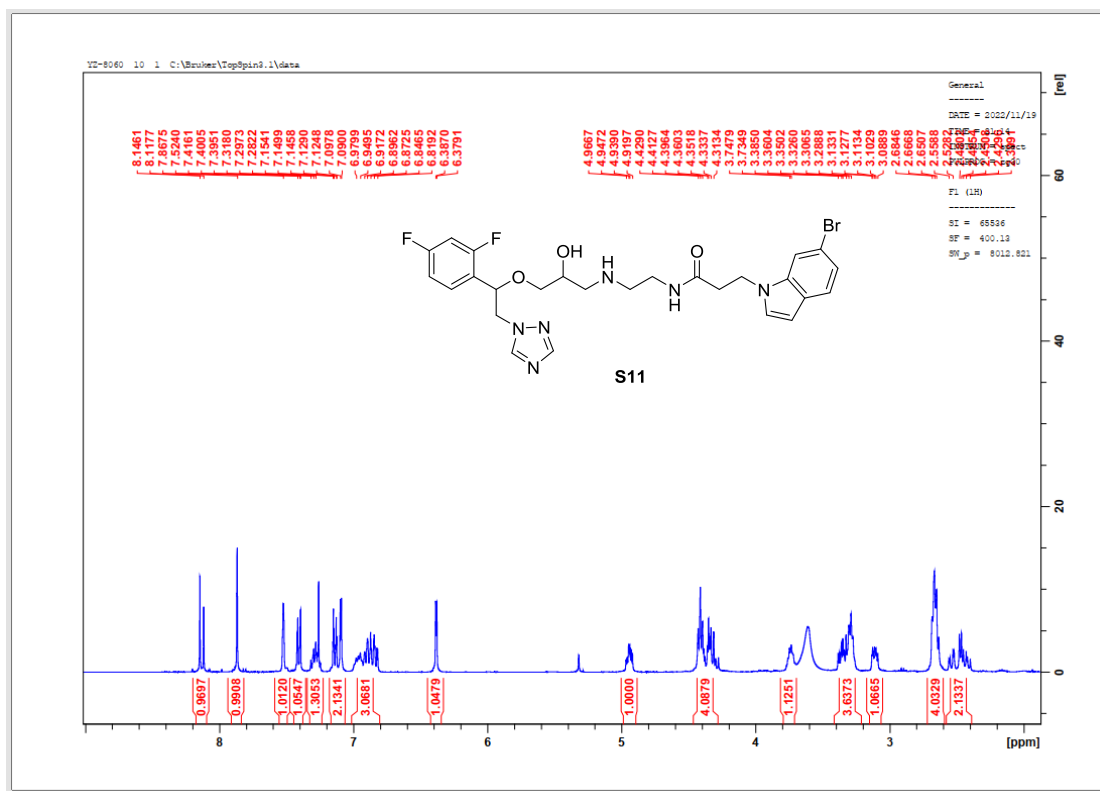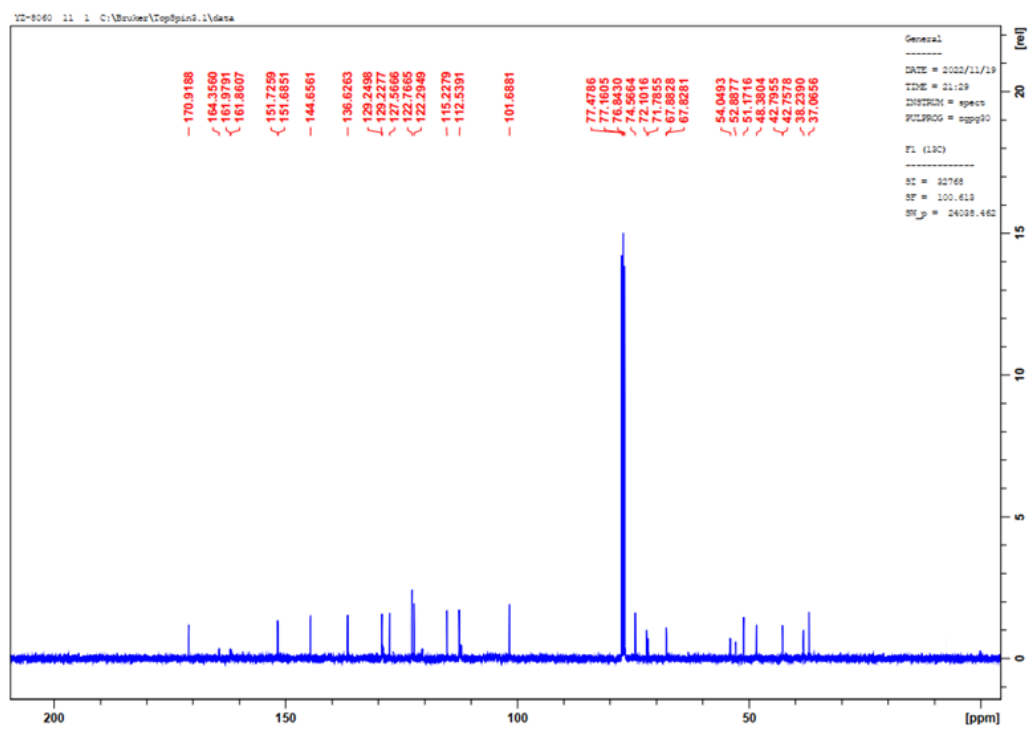

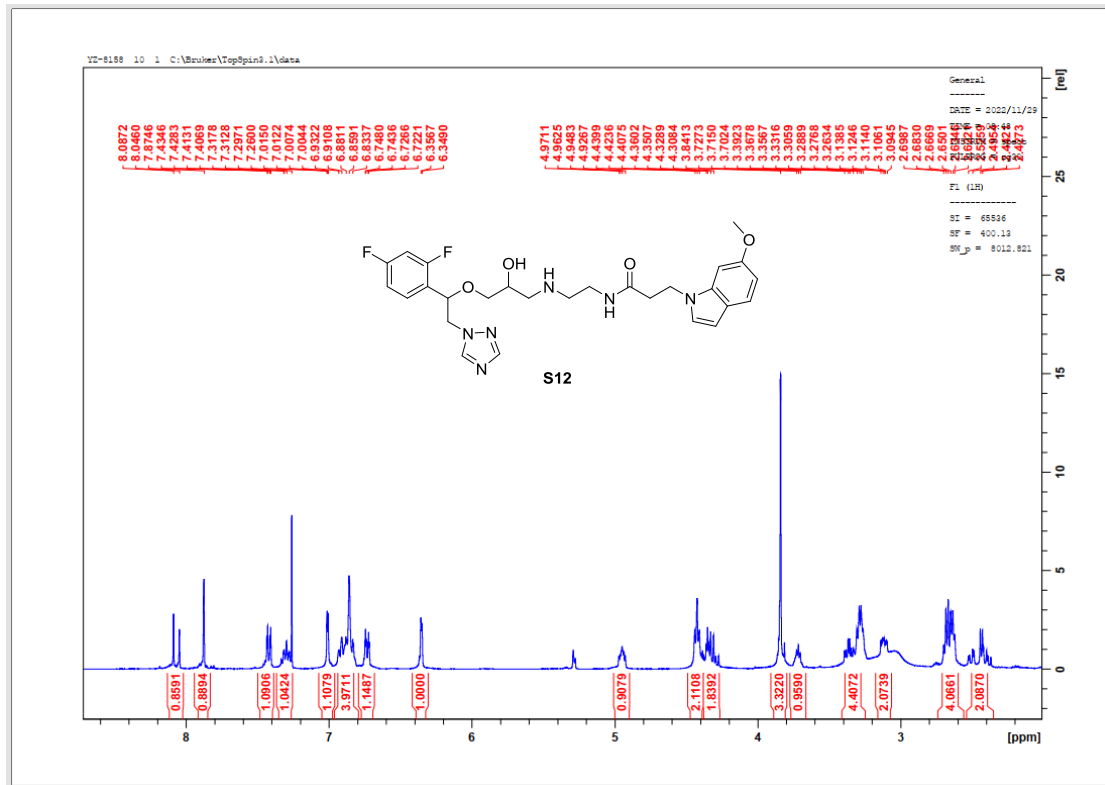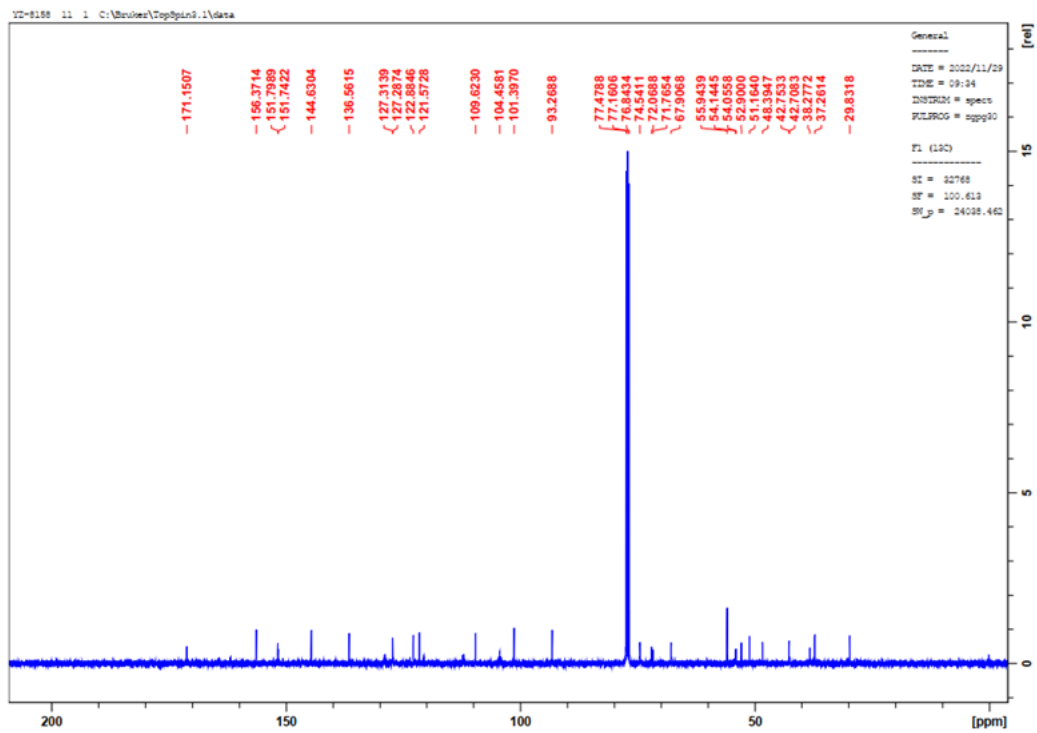

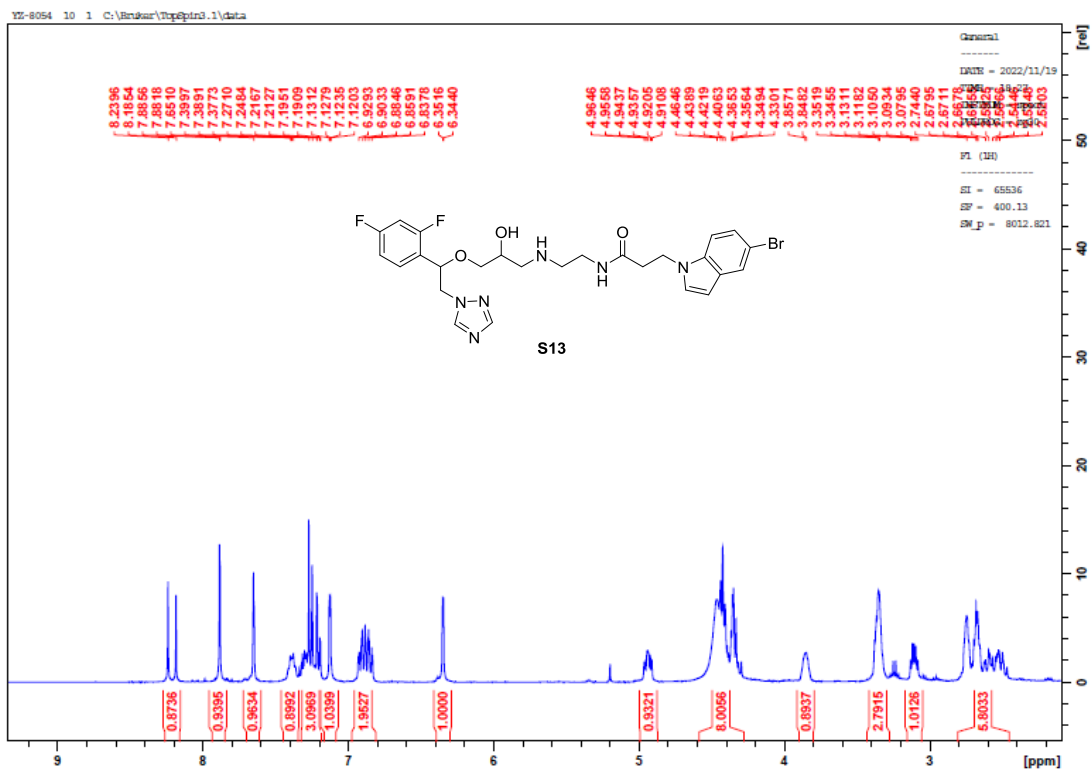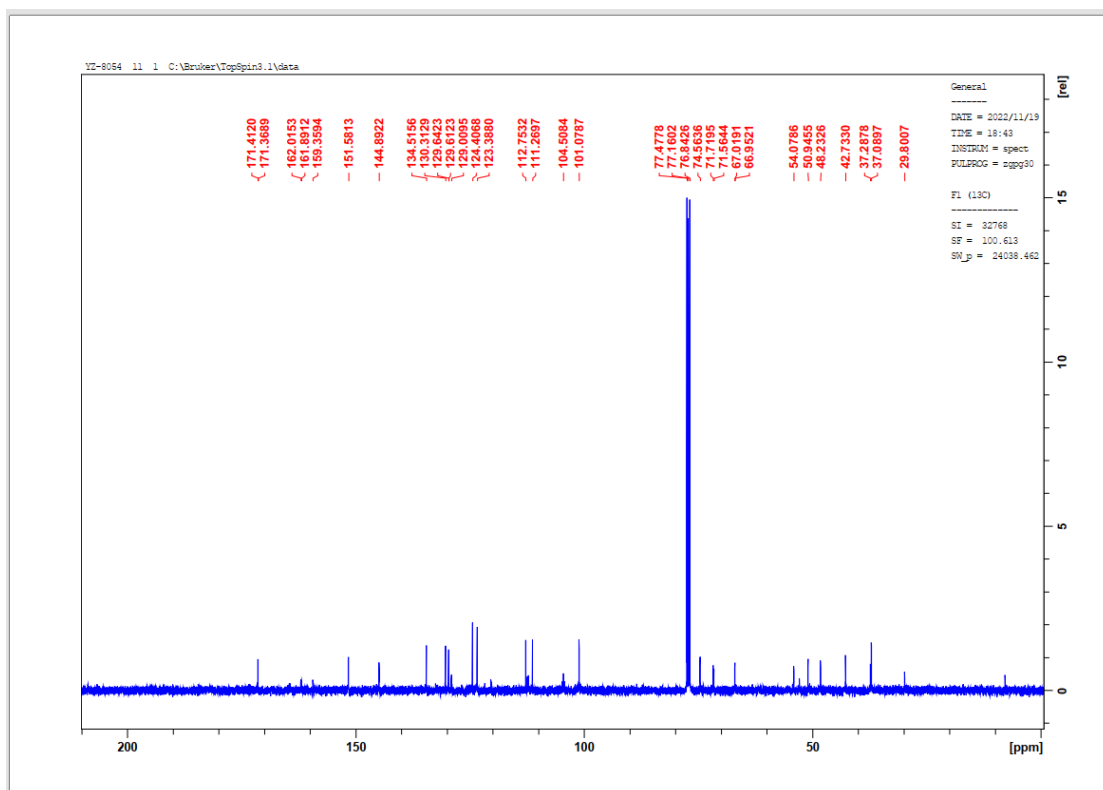

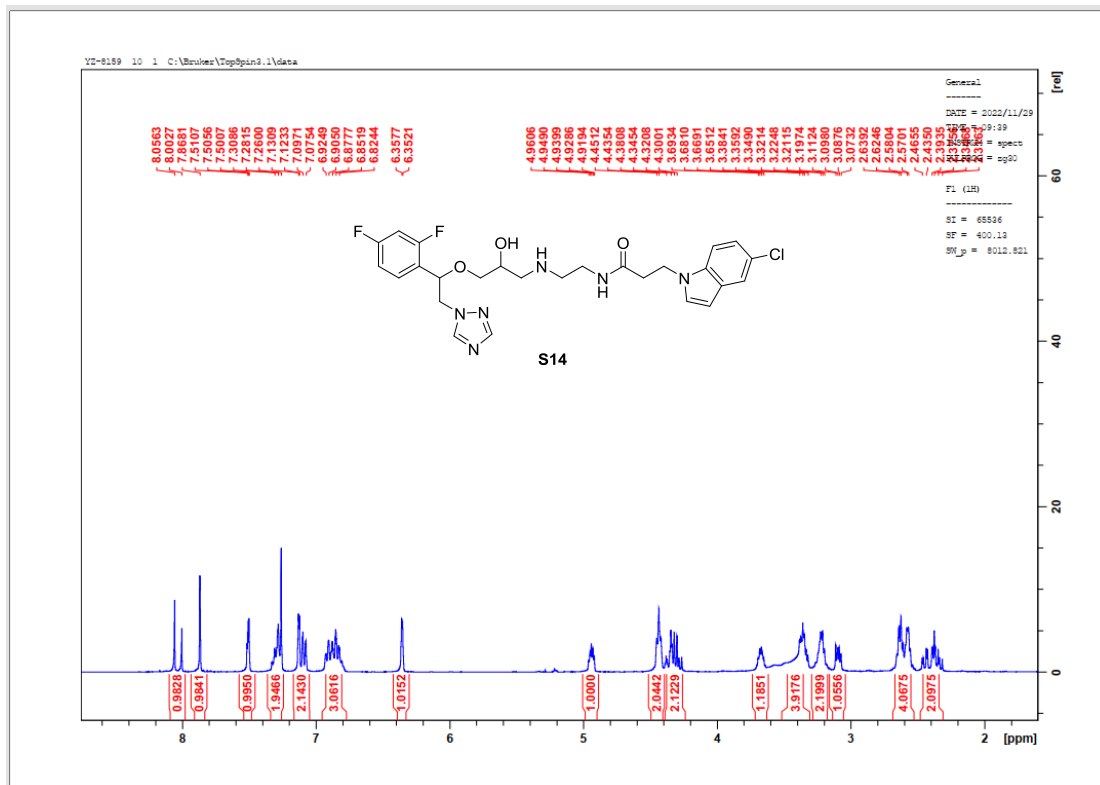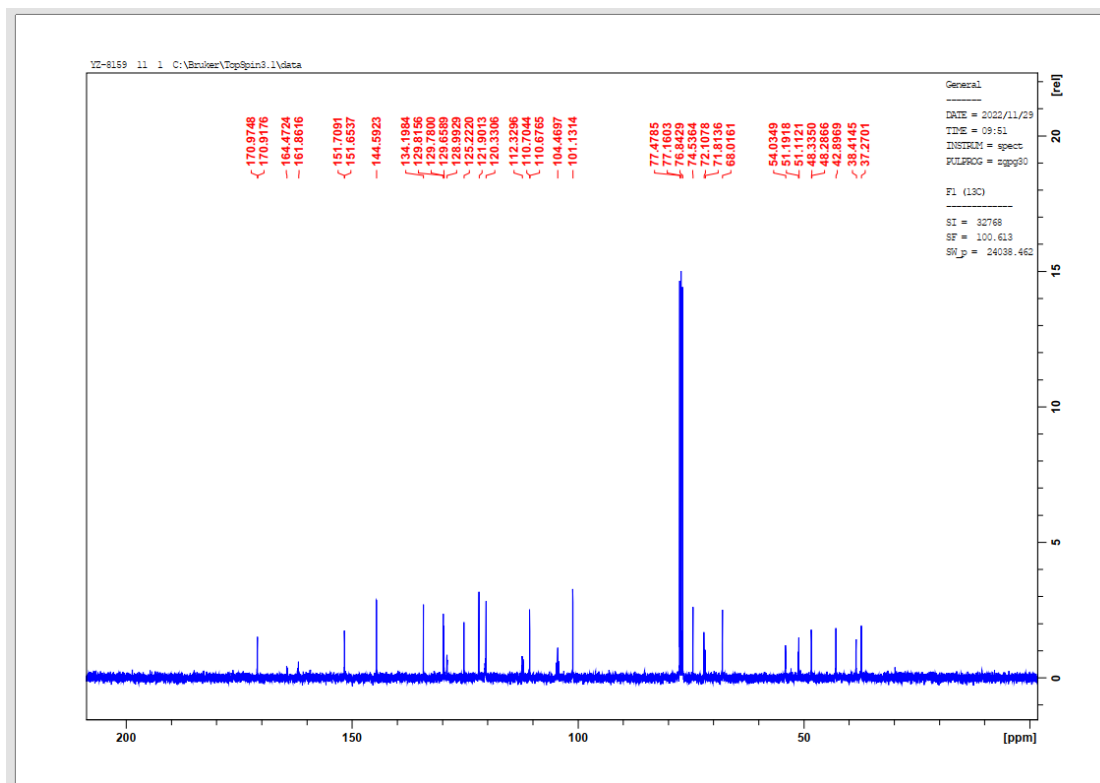

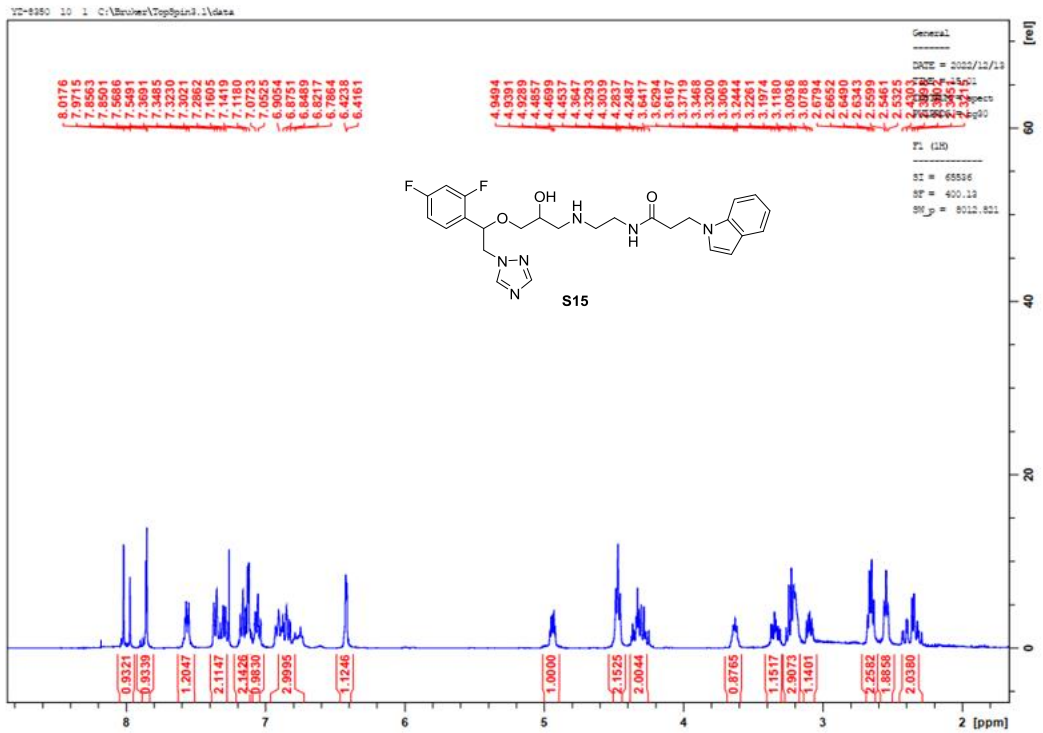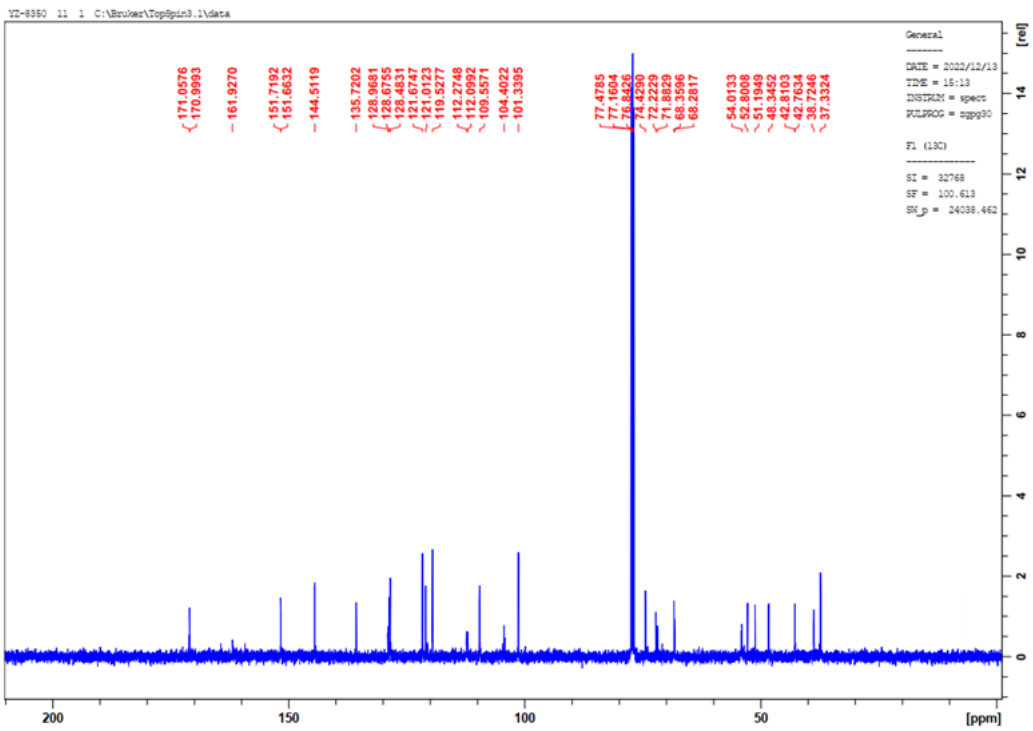



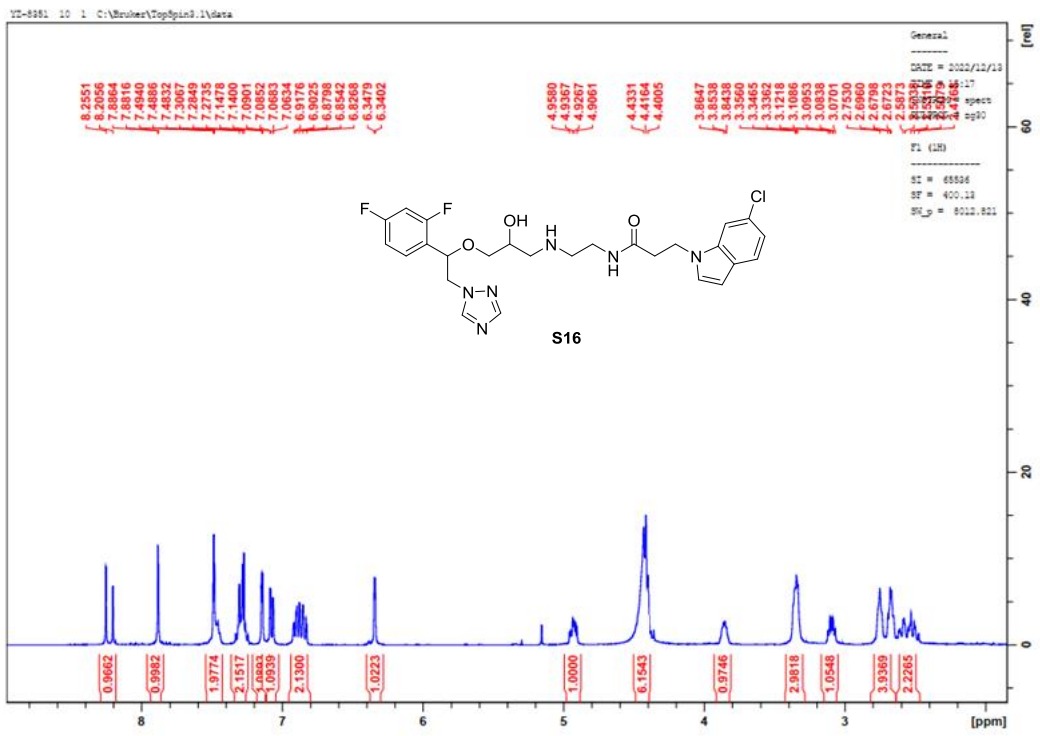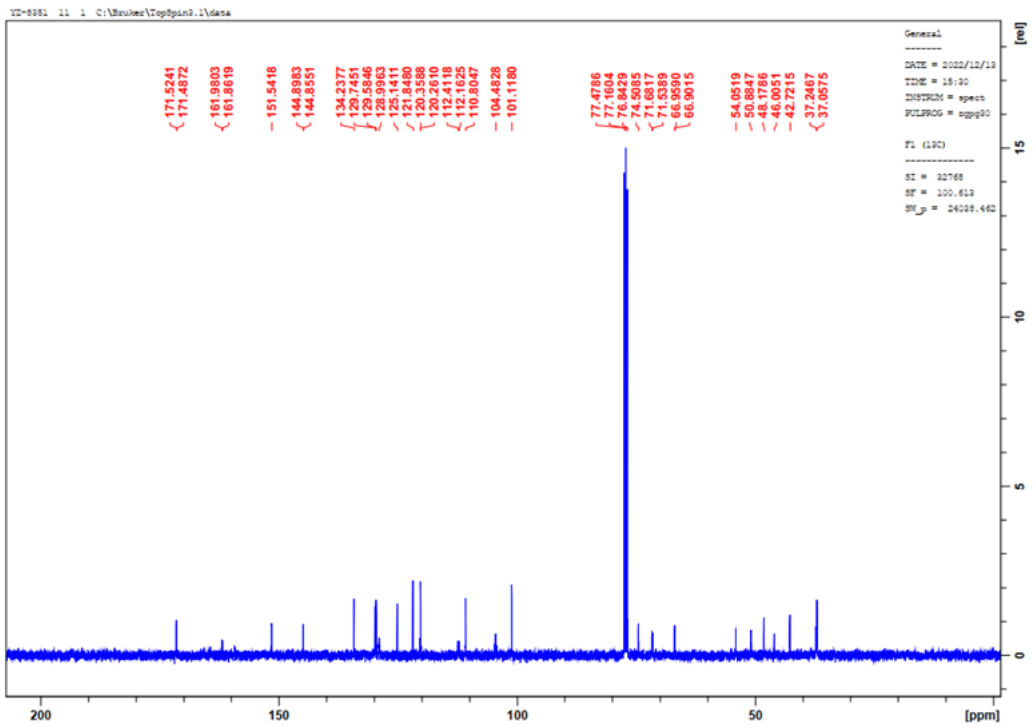

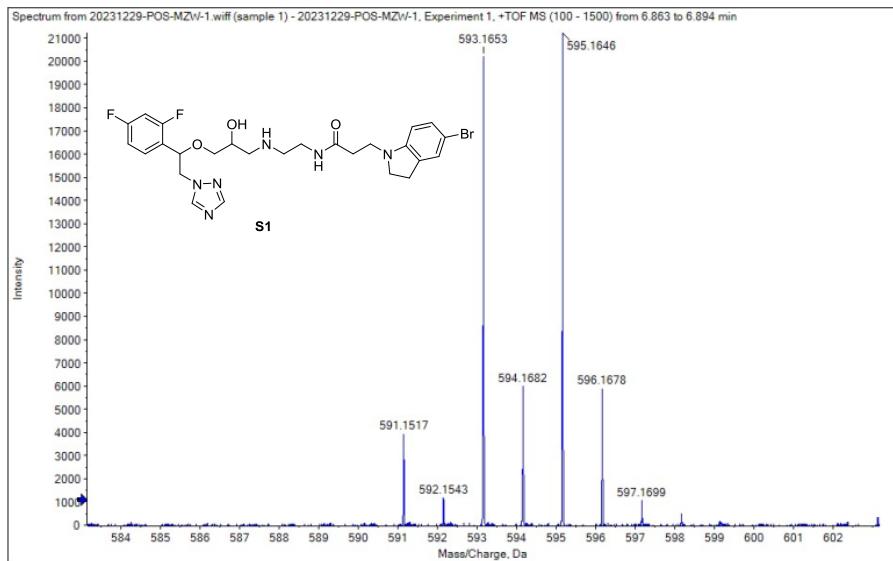

2023/12/29 14:12:54

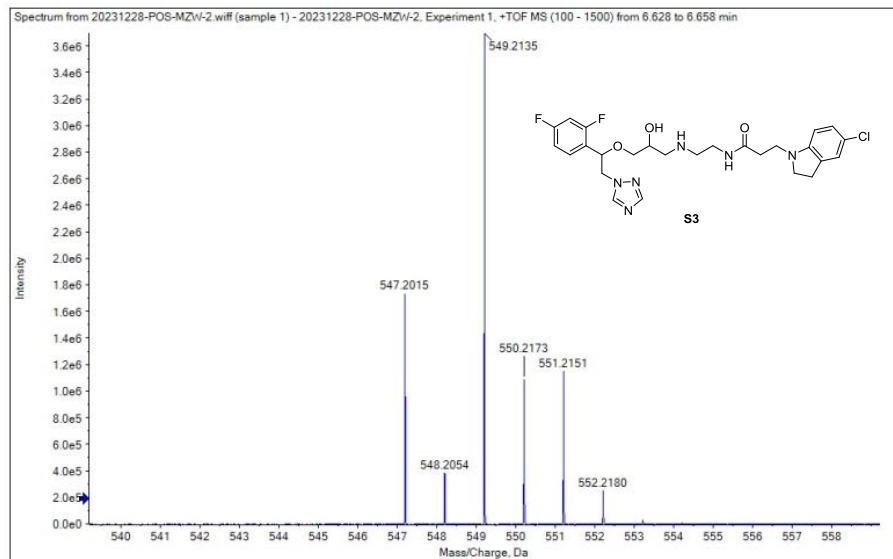

2023/12/29 14:18:33

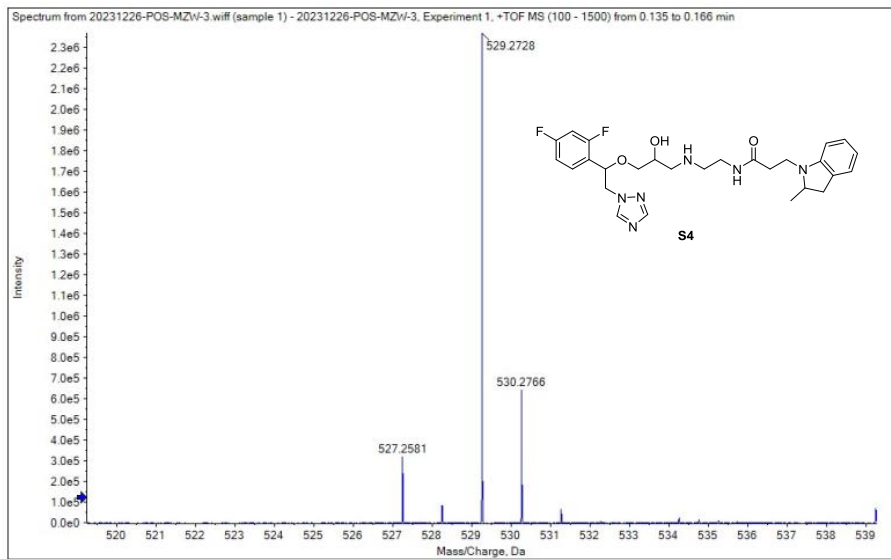

2023/12/27 9:51:49

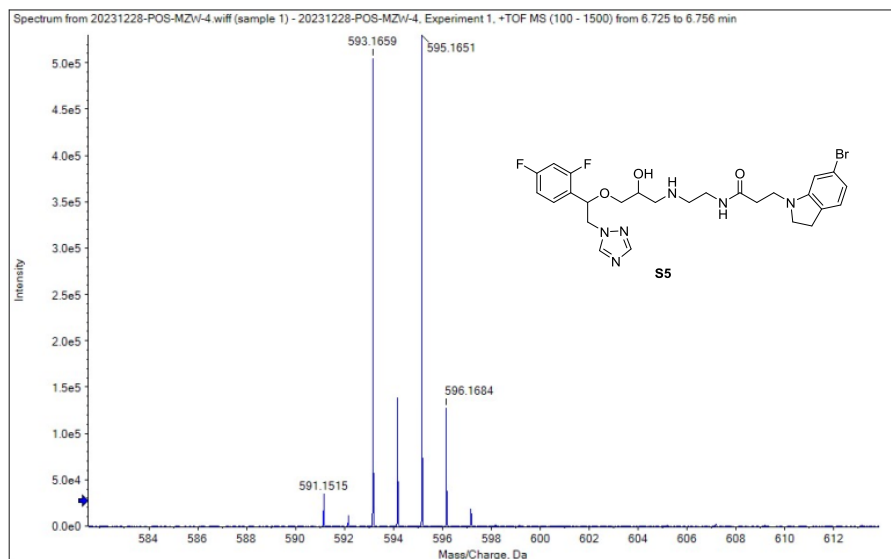

2023/12/29 14:26:36

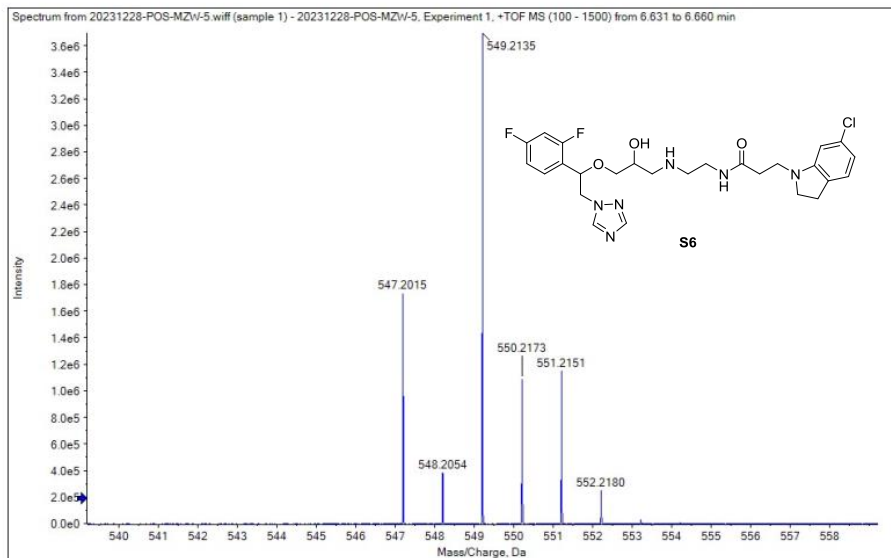

2023/12/29 14:21:43

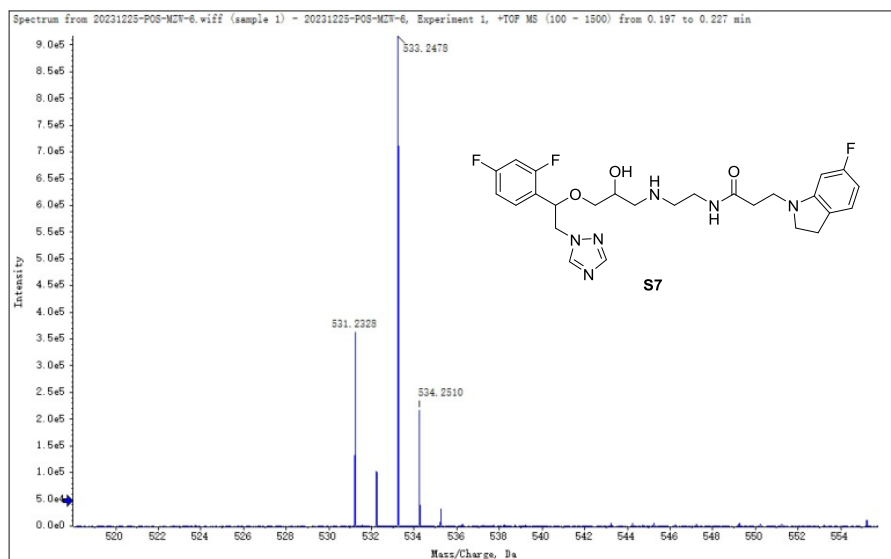

2023/12/25 21:59:19

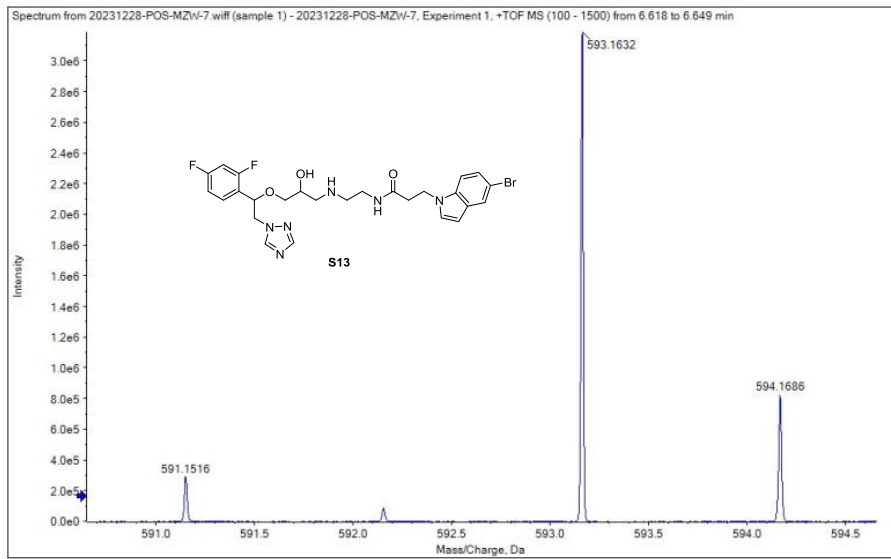

2023/12/29 14:23:45

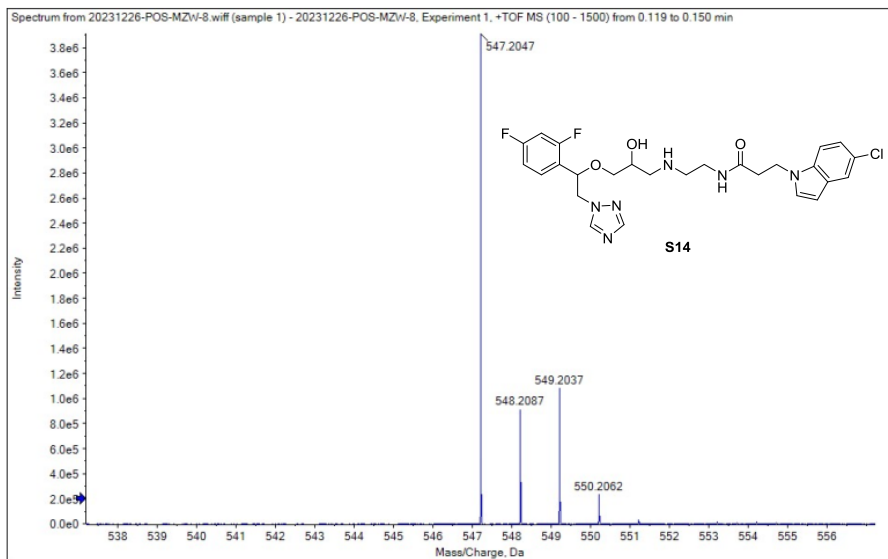

2023/12/27 9:50:24

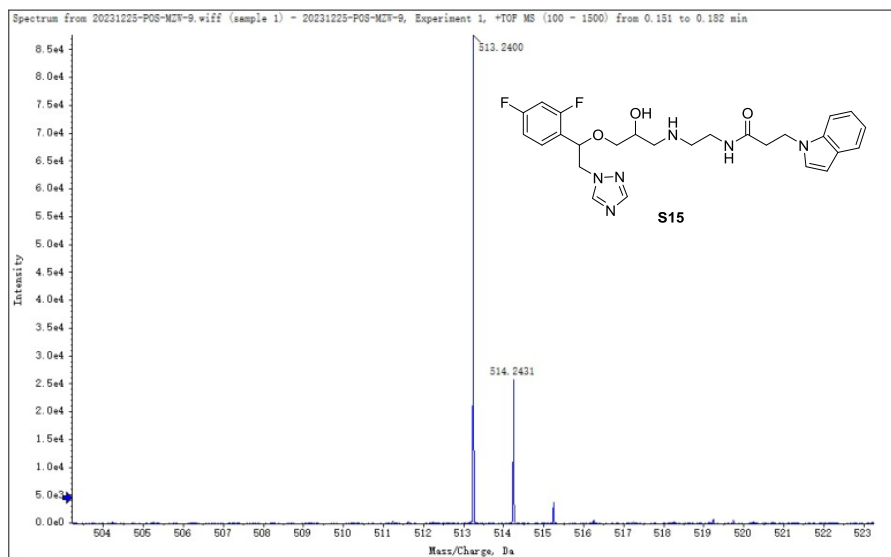

2023/12/25 21:57:41

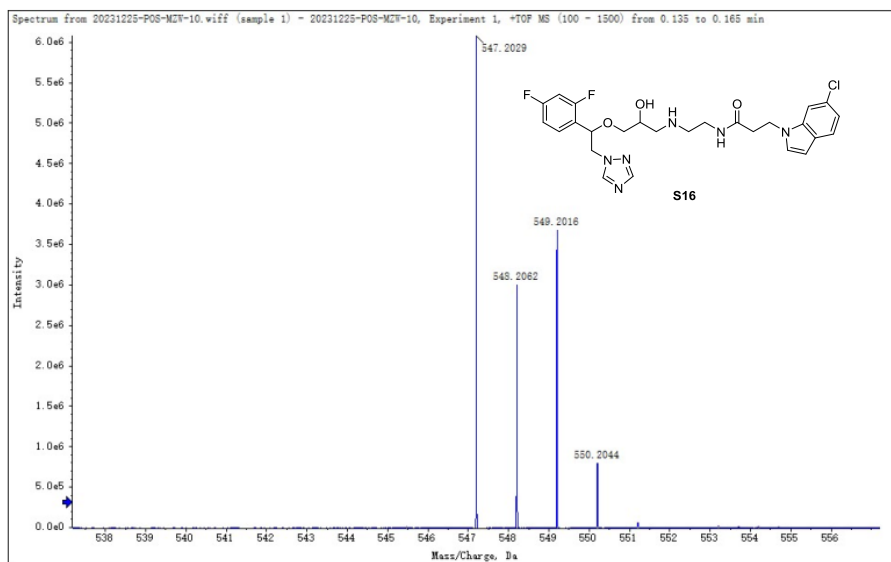

2023/12/25 21:56:45
